# Supplementary material for: Adipocyte OX40L Promotes Adipose T Cell Activation and Insulin Resistance in Obesity
Source: Research Square preprint supplement (doi:10.21203/rs.3.rs-7361491/v1), 2025-09-01
Supplement: Supplementary file 4 [file b62071e7238c1374d90a3b95.docx]

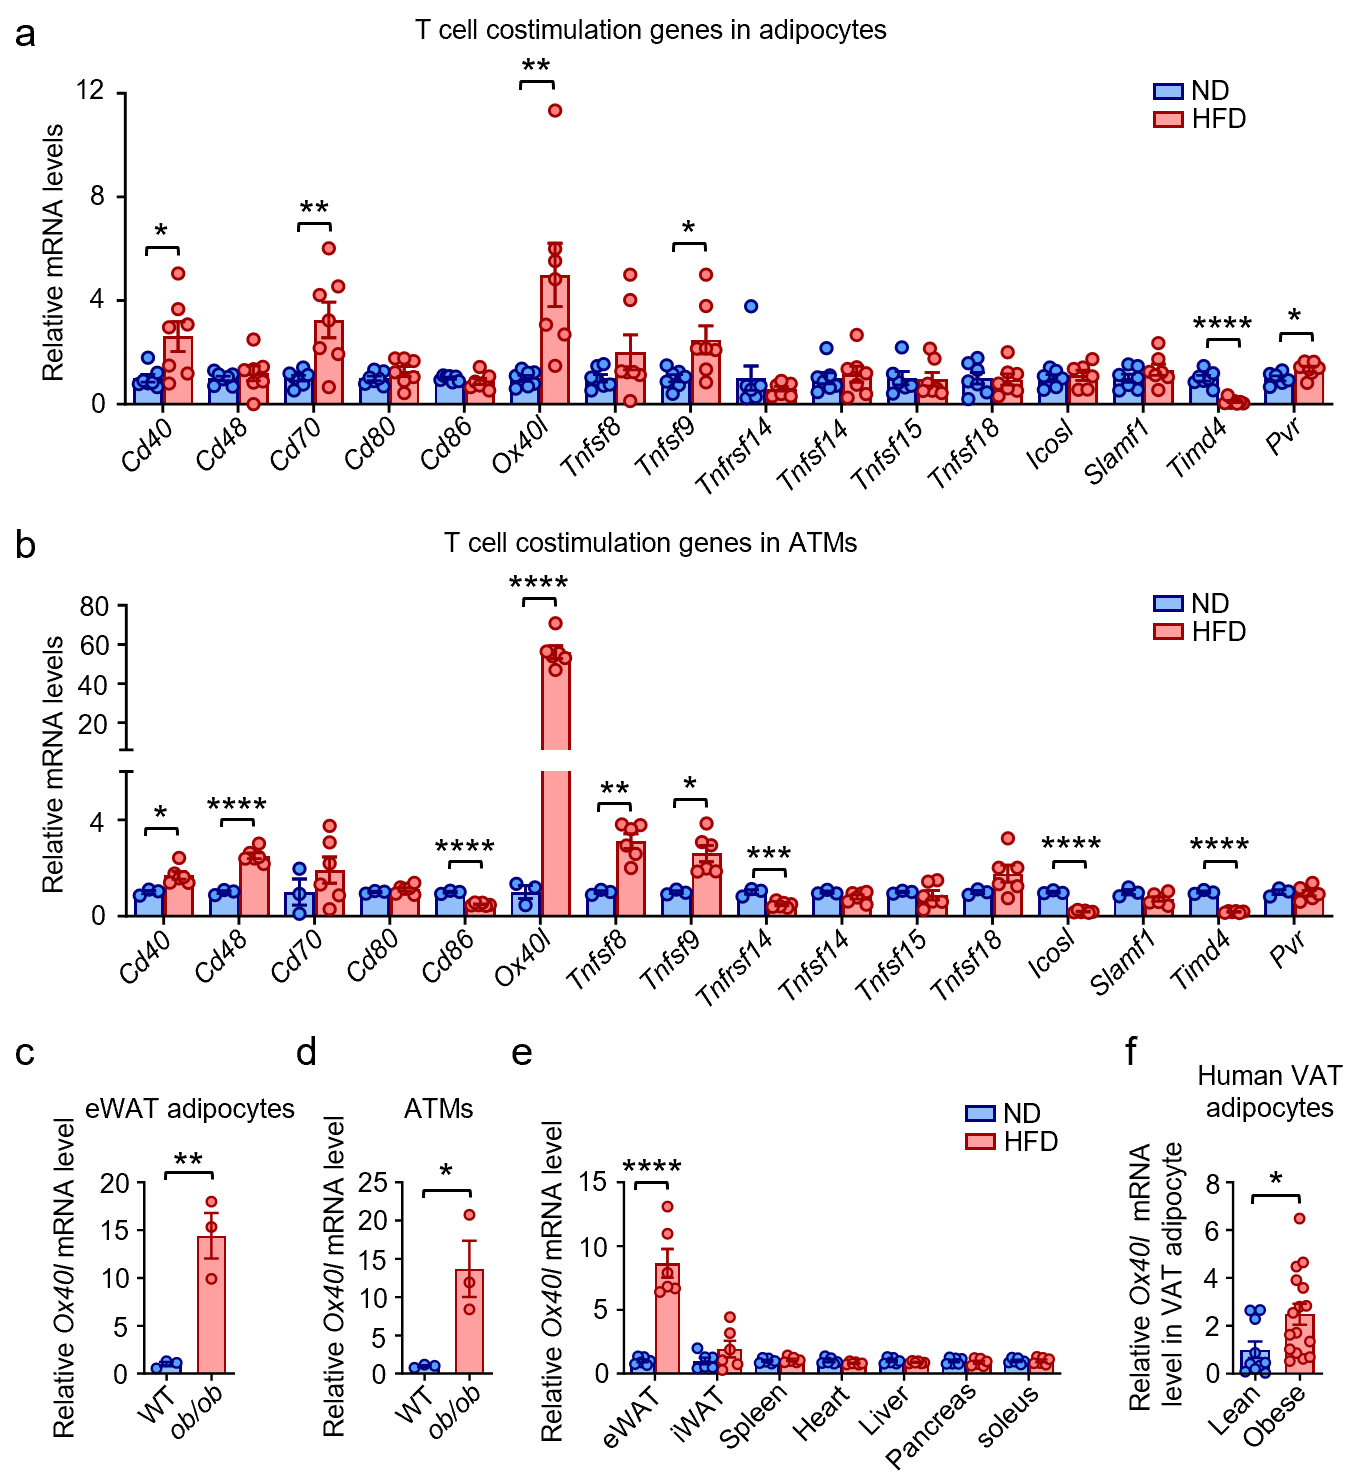


**Supplementary Fig. 1 Obesity induces OX40L expression in adipocytes and ATMs.** (**a**) RT-qPCR analysis of mRNA expression of various costimulatory molecules in eWAT adipocytes from 12-weeks ND and HFD mice (n = 6–7 per group). (**b**) RT-qPCR analysis of mRNA expression of various costimulatory molecules in eWAT macrophages from 12-weeks ND and HFD mice (n = 3–6 per group). (**c**) RT-qPCR analysis of OX40L mRNA expression in eWAT adipocytes from WT and *ob/ob* mice (n = 3 per group). (**d**) RT-qPCR analysis of OX40L mRNA expression in eWAT macrophages from WT and *ob/ob* mice (n = 3 per group). (**e**) RT-qPCR analysis of OX40L mRNA expression in various tissues from 12-weeks ND and HFD mice (n = 6 per group). (**f**) RT-qPCR analysis of OX40L mRNA expression in human VAT adipocytes (n = 10–16 per group). Data represent mean ± SEM. **P* < 0.05, ***P* < 0.01, ****P* < 0.001, and *****P* < 0.0001.


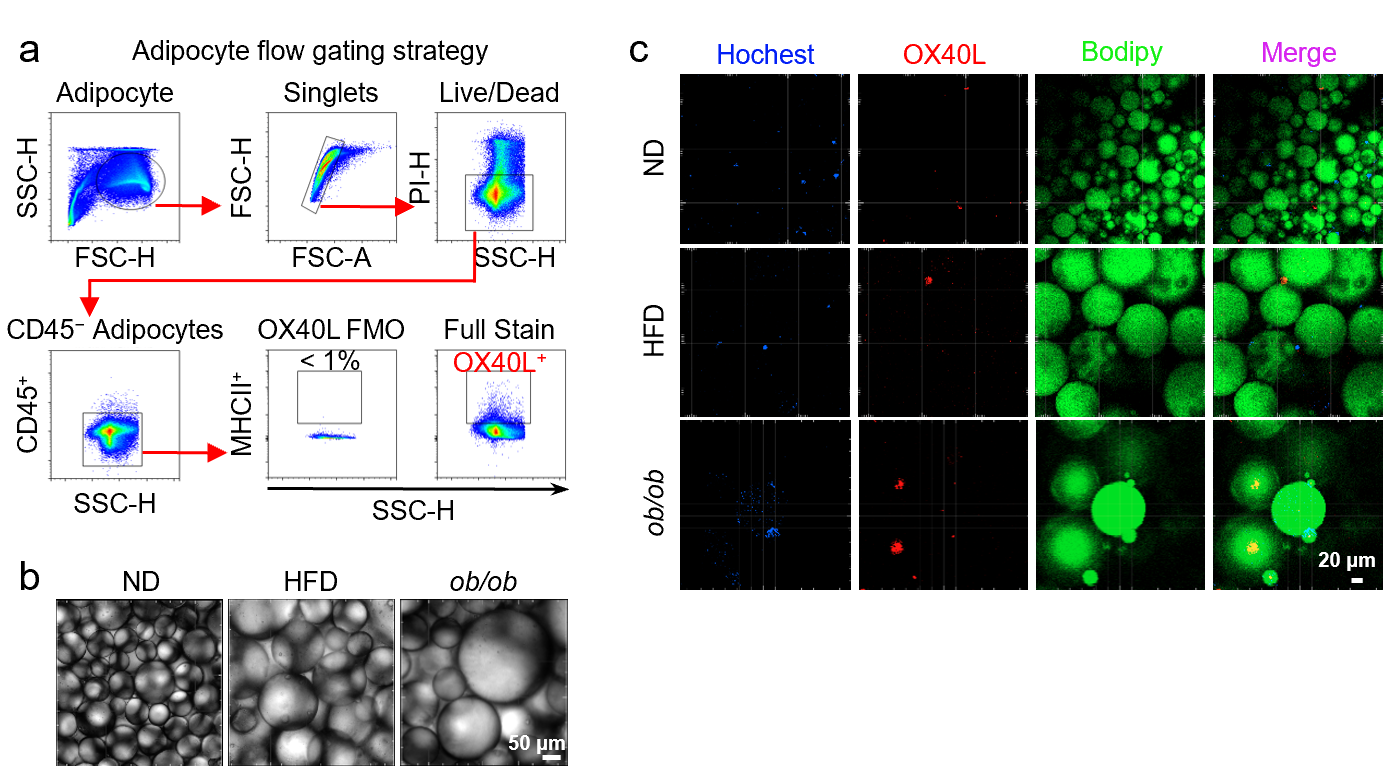
 **Supplementary Fig. 2 Characterization of adipocytes by flow cytometry.** (**a**) Adipocyte flow gating strategy. (**b**) Bright-field images of adipocytes following flow cytometry staining (scale bar: 50 μm). (**c**) Representative fluorescence images of adipocytes stained for OX40L (scale bar: 20 μm).


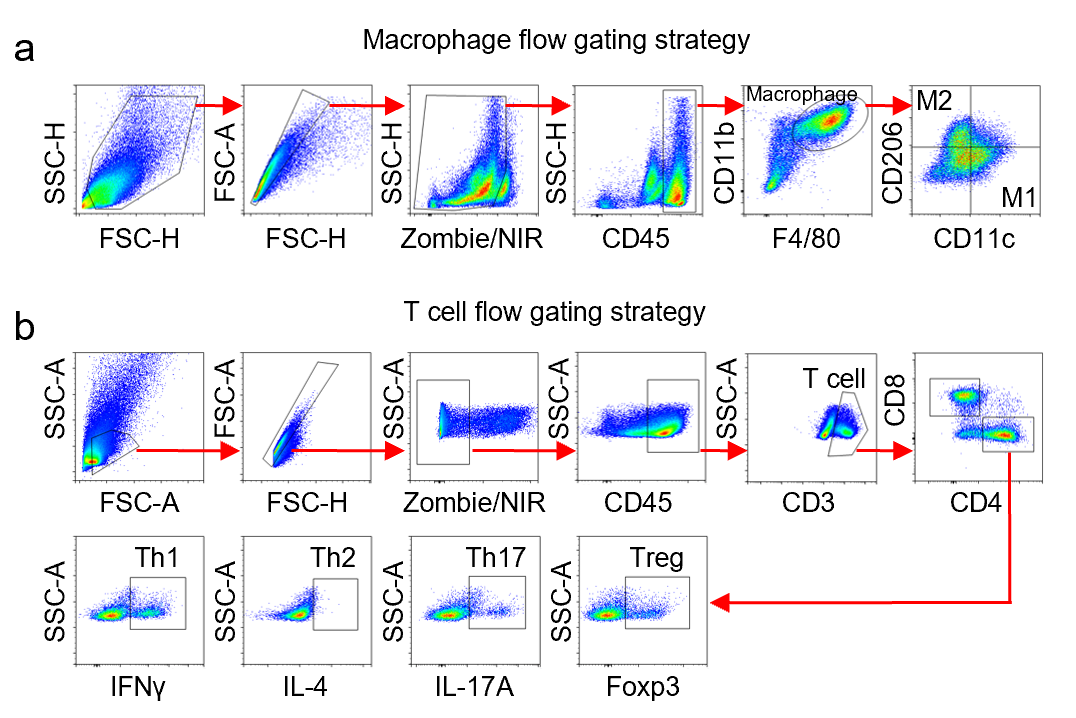
 **Supplementary Fig. 3** **Flow cytometry gating strategy for T cells and macrophages.** (**a**) Macrophage flow gating strategy. (**b**) T cell flow gating strategy.


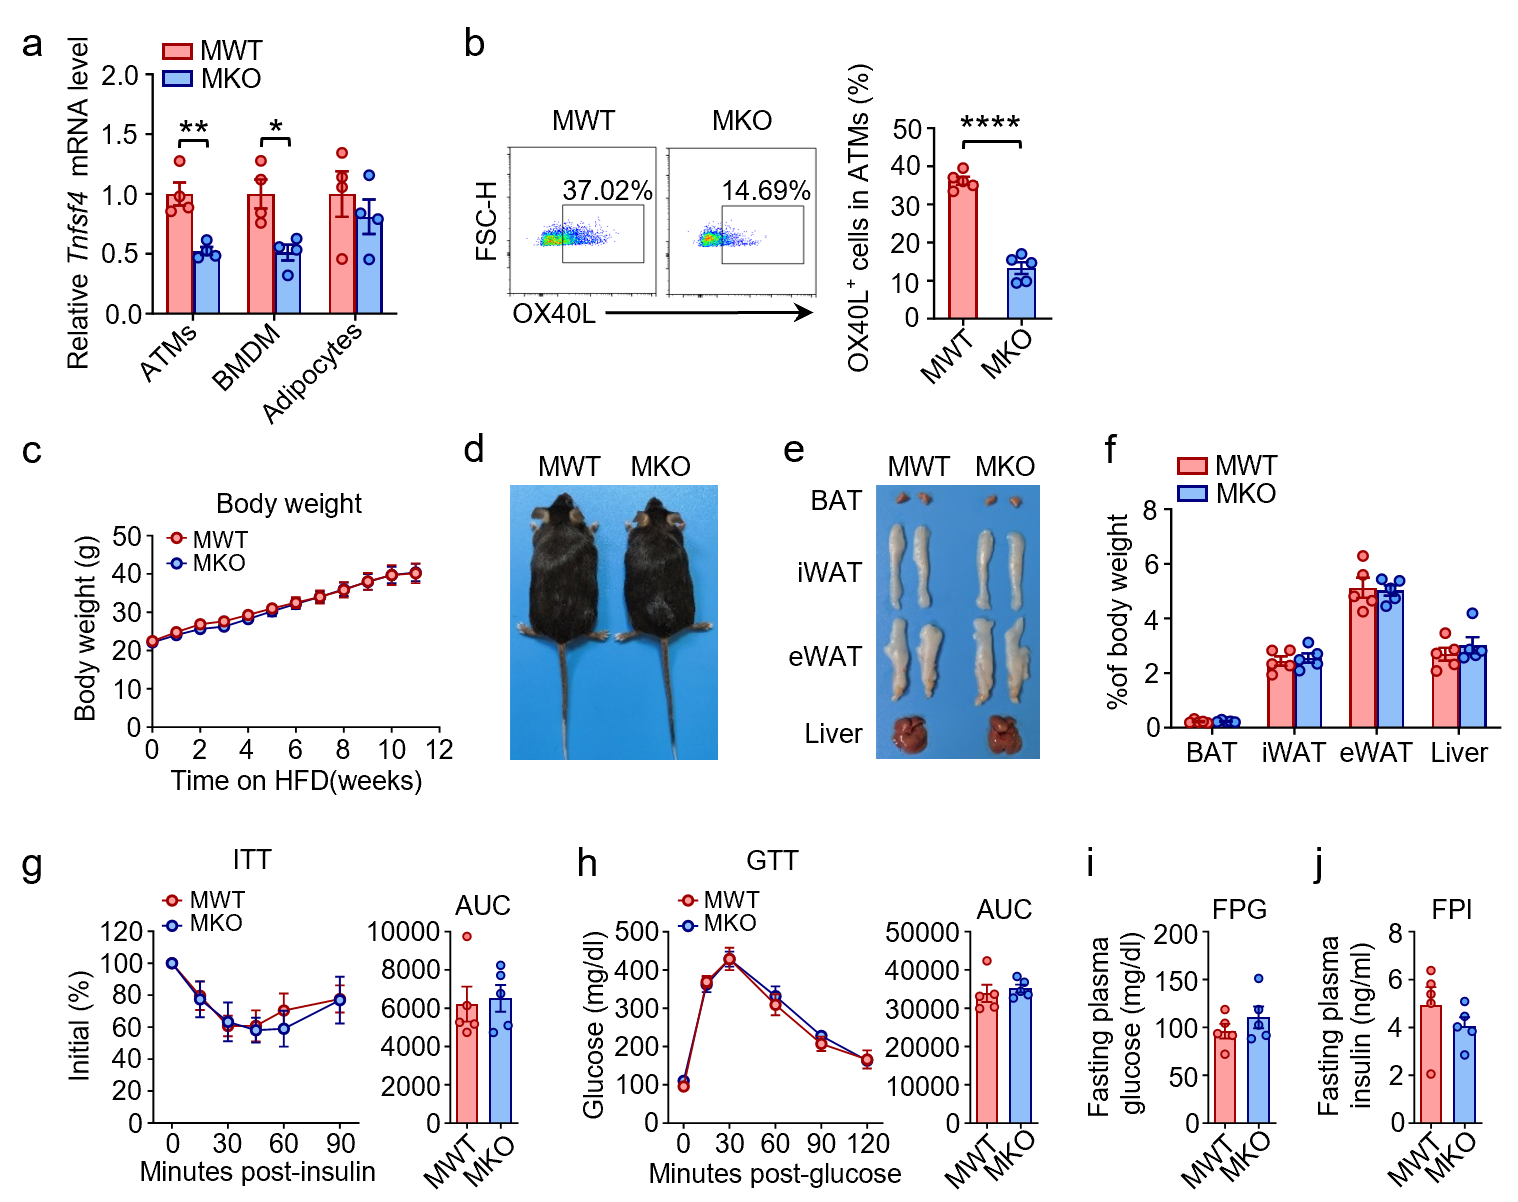


**Supplementary Fig. 4 Macrophage-specific OX40L deficiency does not affect HFD-induced insulin resistance.** Macrophage-specific OX40L knockout (MKO) and littermate control (MWT) mice were fed an HFD for 12 weeks. (**a**) RT-qPCR analysis of OX40L mRNA expression in eWAT ATMs, BMDMs, and eWAT adipocytes from MKO and MWT mice (n = 4 per group). (**b**) Flow cytometry analysis of OX40L+ cell proportions in eWAT macrophages from MKO and MWT mice (n = 5 per group). (**c**) Body weight of MKO and MWT mice (n = 5 per group). (**d**) Representative images of MKO and MWT mice. (**e**) Representative images of BAT, iWAT, eWAT, and liver from MKO and MWT mice. (**f**) Weight percentages of BAT, iWAT, eWAT, and liver relative to body weight (n = 5 per group). (**g**) ITT results for MKO and MWT mice (n = 5 per group). (**h**) GTT results for MKO and MWT mice (n = 5 per group). (**i**) FPG levels of MKO and MWT mice (n = 5 per group). (**j**) FPI levels of MKO and MWT mice (n = 5 per group). Data represent mean ± SEM. **P* < 0.05, ***P* < 0.01, and *****P* < 0.0001.


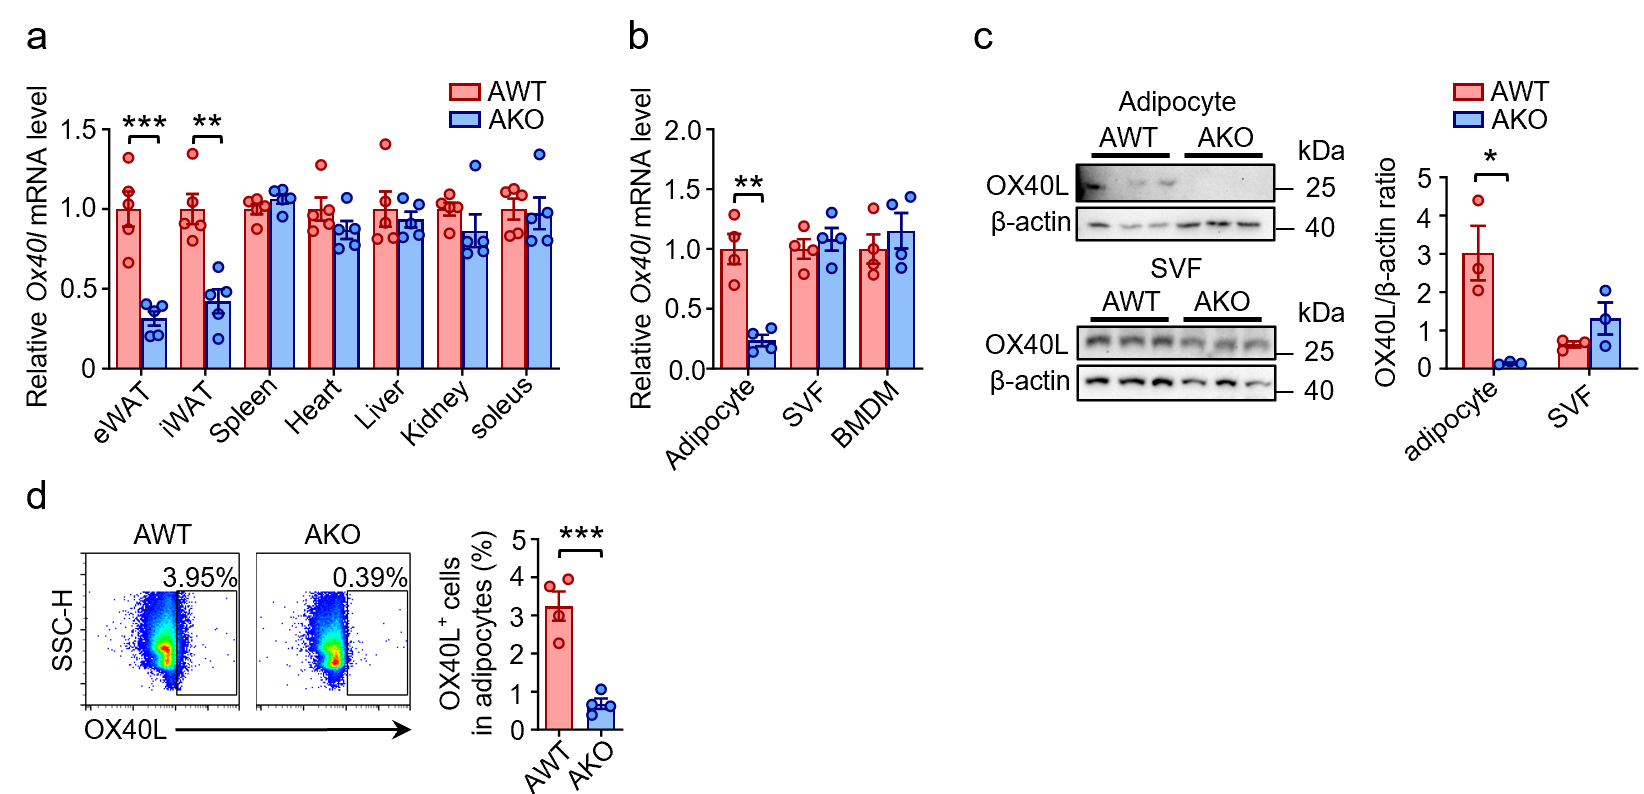
 **Supplementary Fig. 5 The establishment of adipocyte-specific OX40L knockout mice model.** AKO and AWT mice were fed an HFD for 12 weeks. (**a**) RT-qPCR analysis of OX40L mRNA expression in various tissues from AKO and AWT mice (n = 5 per group). (**b**) RT-qPCR analysis of OX40L mRNA expression in eWAT adipocytes, SVF, and BMDMs from AKO and AWT mice (n = 4 per group). (**c**) Western blot analysis of OX40L protein expression in eWAT adipocytes and SVF from AKO and AWT mice (n = 3 per group). (**d**) Flow cytometry analysis of OX40L+ cell proportions in eWAT adipocytes from AKO and AWT mice (n = 4 per group). Data represent mean ± SEM. **P* < 0.05, ***P* < 0.01, and ****P* < 0.001.


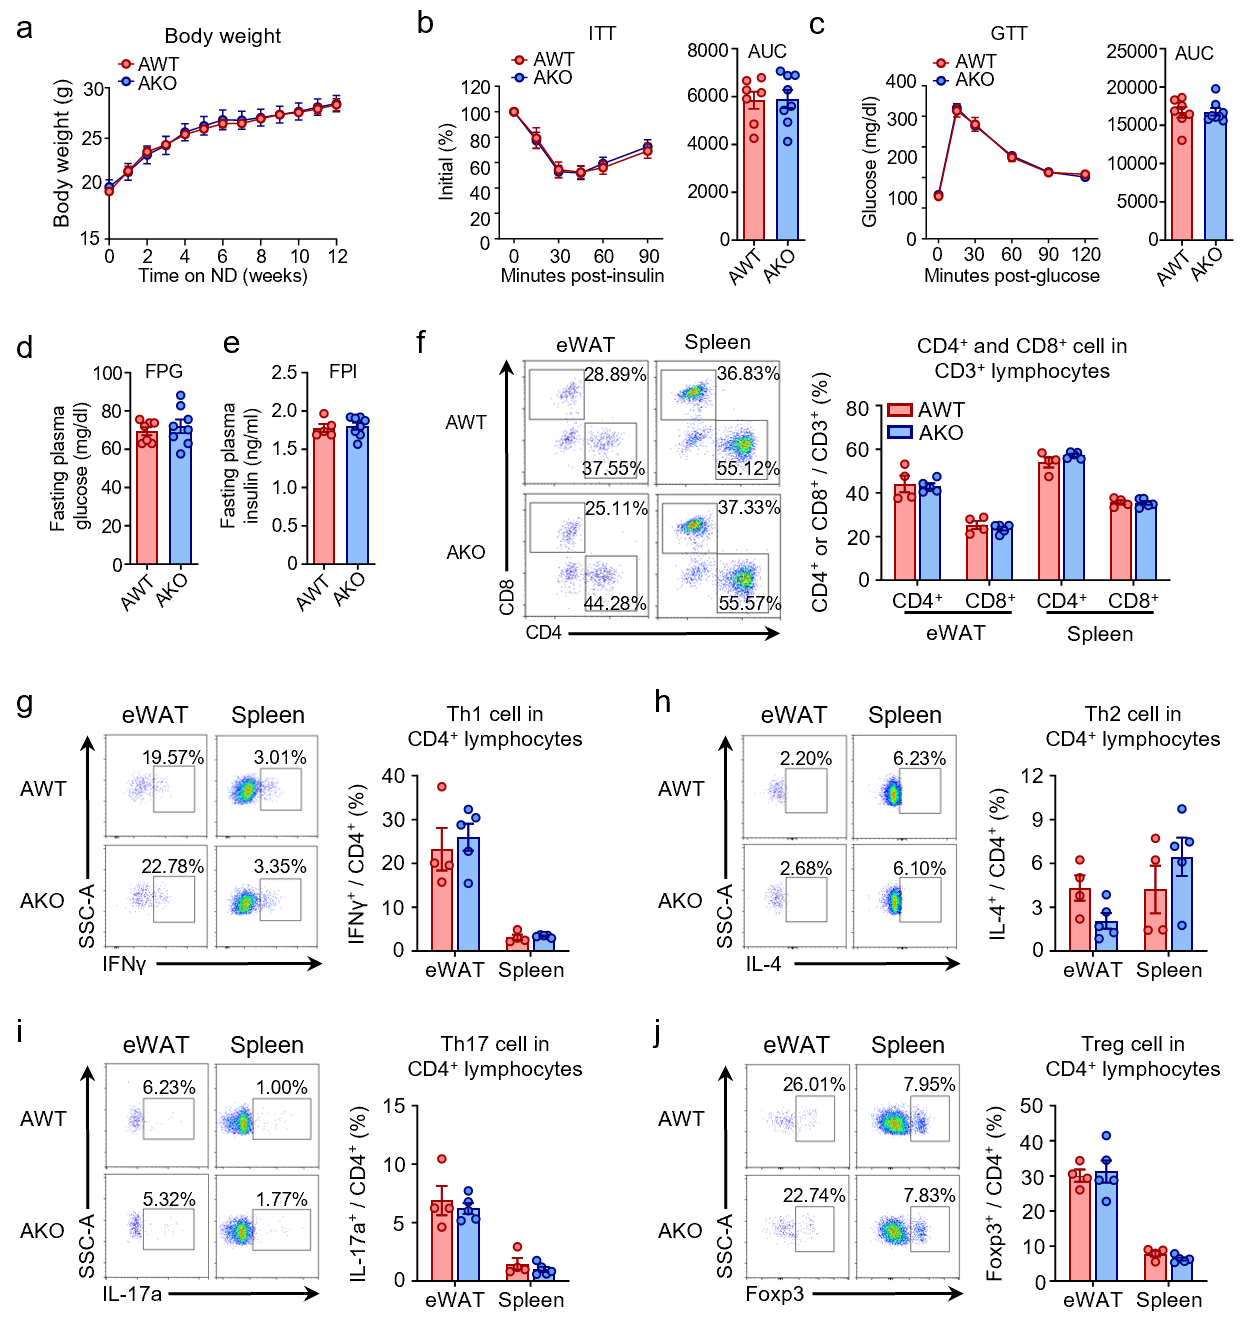


**Supplementary Fig. 6** **Adipocyte-specific OX40L deficiency has no effect on insulin sensitivity and T cell accumulation in adipose tissue under ND-fed condition.** AKO and AWT mice were fed an ND for 12 weeks. (**a**) Body weight of AKO and AWT mice (n = 7–8 per group). (**b**) ITT results for AKO and AWT mice (n = 7–8 per group). (**c**) GTT results for AKO and AWT mice (n = 7–8 per group). (**d**) FPG levels of AKO and AWT mice (n = 7–8 per group). (**e**) FPI levels of AKO and AWT mice (n = 5–8 per group). (**f**) Flow cytometry analysis of CD4+ and CD8+ T cell populations in eWAT and spleen from AKO and AWT mice (n = 4–5 per group). (**g**) Flow cytometry analysis of Th1 cell populations in eWAT and spleen from AKO and AWT mice (n = 4–5 per group). (**h**) Flow cytometry analysis of Th2 cell populations in eWAT and spleen from AKO and AWT mice (n = 4–5 per group). (**i**) Flow cytometry analysis of Th17 cell populations in eWAT and spleen from AKO and AWT mice (n = 4–5 per group). (**j**) Flow cytometry analysis of Treg cell populations in eWAT and spleen from AKO and AWT mice (n = 4–5 per group). Data represent mean ± SEM.


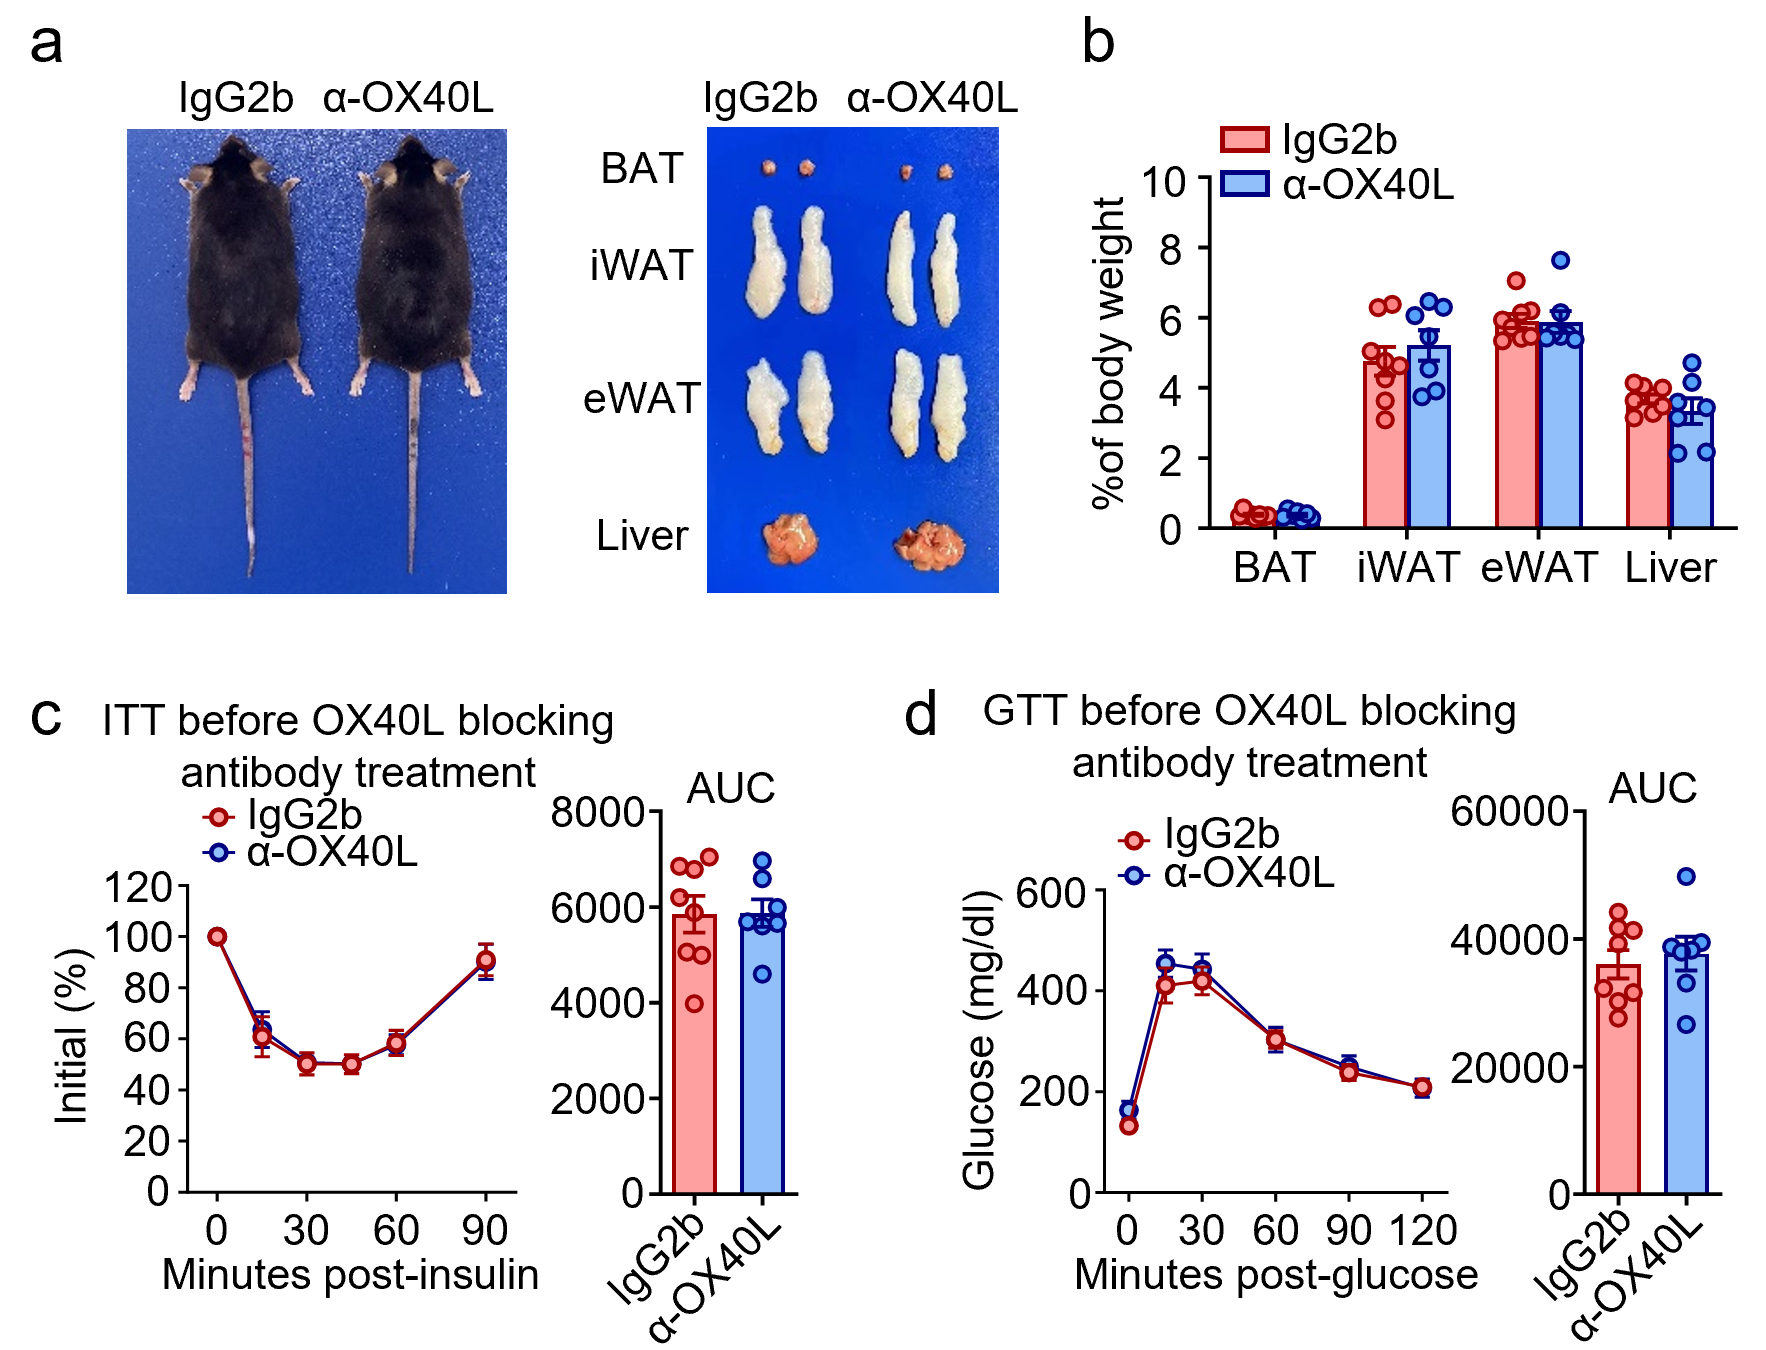


**Supplementary Fig. 7** **OX40L blocking antibody** **does not alter body composition, and** **baseline metabolic profiles showed no intergroup differences.** (**a**) Representative images of α-OX40L and IgG2b-treated mice and their BAT, iWAT, eWAT, and liver. (**b**) Weight percentages of BAT, iWAT, eWAT, and liver relative to body weight (n = 7–8 per group). (**c**) ITT results before antibody treatment (n = 7–8 per group). (**d**) GTT results before antibody treatment (n = 7–8 per group). Data represent mean ± SEM.
